# Supplementary material
Source: Springer Nature journal article supplement (https://www.springermedizin.de/resource/supplementary/12936_2012_2176_MOESM3_ESM.pdf/9542716)

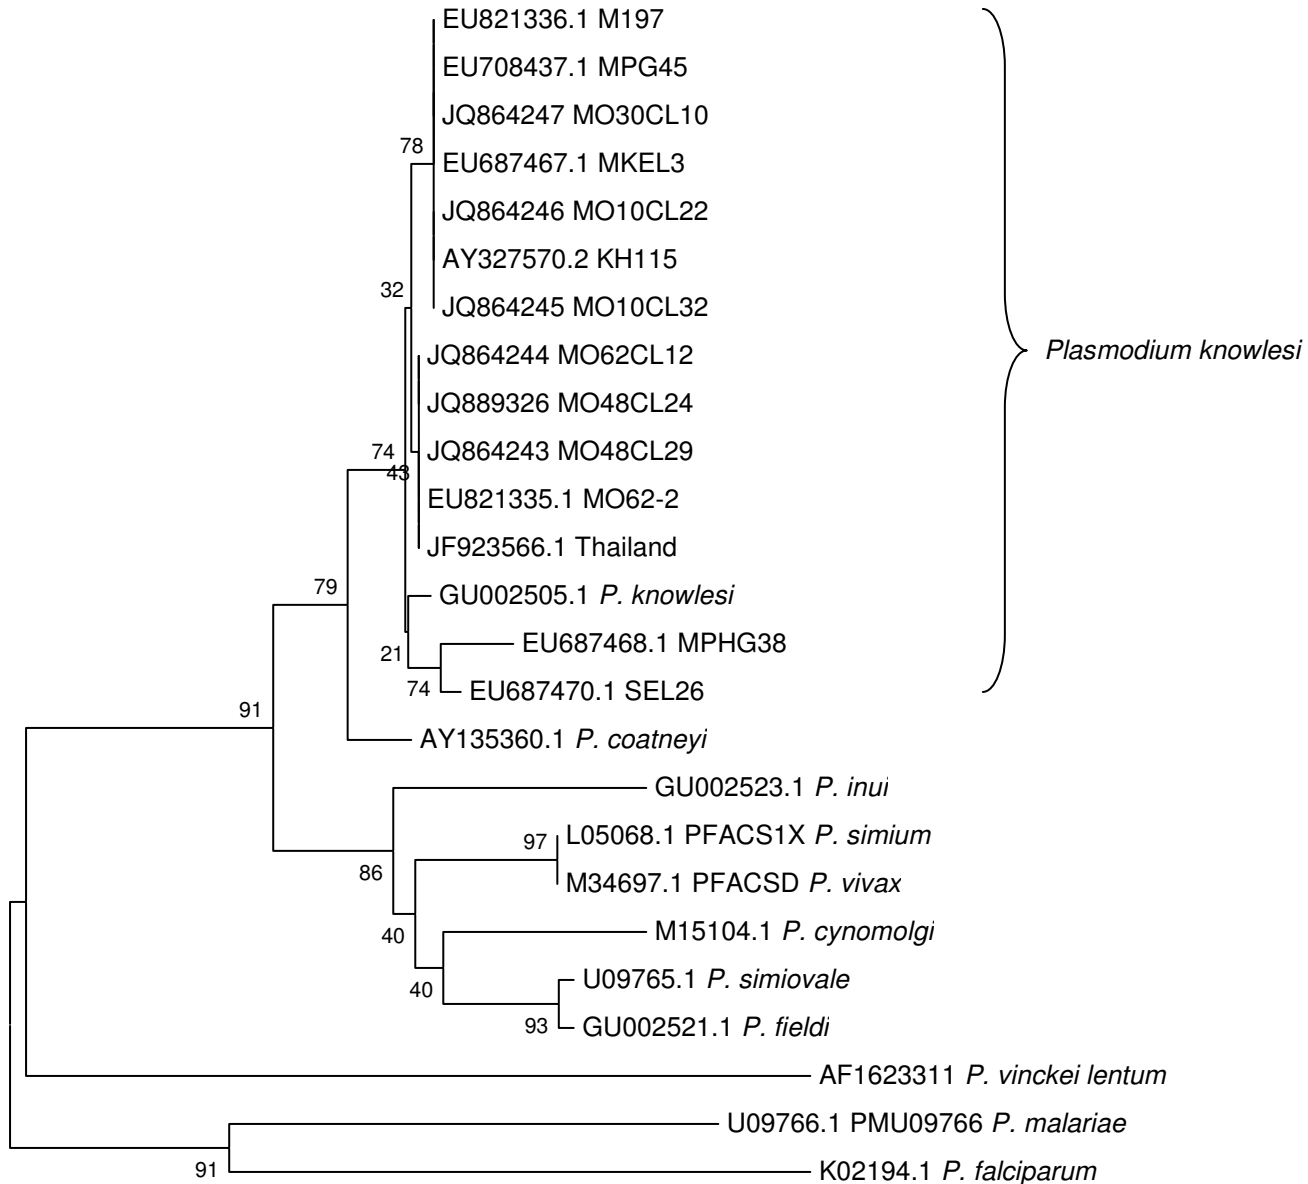

0.05

Supplement: MOESM3 [file 9542716]
